# Supplementary material for: Aging amplifies synergistic adsorption and reduction of Cr(VI) by polyamide microplastics
Source: Research Square preprint supplement (doi:10.21203/rs.3.rs-8079109/v1), 2025-12-03
Supplement: Supplementary file 1 [file 68f9c20d7c7755f8b44978f3.docx]

**Supporting Information for**

**Aging amplifies synergistic adsorption and reduction of Cr(VI) by polyamide microplastics**

Sihao Chen, Wei Cao*, Hao Li, Meng Han, Wenhai Shi, Xiaobin Liao, Zhenming Zhou

*College of Civil Engineering, Huaqiao University, Xiamen 361021, China*

*Correspondence: Wei Cao, College of Civil Engineering, Huaqiao University, Xiamen 361021, China

E-mail: [weicao@hqu.edu.cn](mailto:weicao@hqu.edu.cn)

**Contents**

[**Text S1. Characterization of PA MPs** 3](#_Toc209270999)

[**Text S2. Adsorption of Cr(VI) on MPs** 4](#_Toc209271000)

[**Text S3. Adsorption influence factors** 5](#_Toc209271001)

[**Text S4. Adsorption kinetics** 6](#_Toc209271002)

[**Text S5. Adsorption isotherms** 7](#_Toc209271003)

[**Text S6. Adsorption transformation** 8](#_Toc209271004)

[**Text S7. Analytical methods** 9](#_Toc209271005)

[**Table S1. Fitting parameters adsorption kinetics for Cr(Ⅵ) to Original-PA, UV-PA, UV-Sea-PA, and Cl-PA.** 10](#_Toc209271006)

[**Table S2. Fitting parameters of adsorption isotherms for Cr(VI) to Original-PA, UV-PA, UV-Sea-PA, and Cl-PA.** 11](#_Toc209271007)

[**Table S3. The 2D-COS data of UV-PA, UV-Sea-PA, and Cl-PA aging.** 12](#_Toc209271008)

[**Table S4. The 2D-COS data of Cr(Ⅵ) adsorption by Original-PA, UV-PA, UV-Sea-PA, and Cl-PA.** 13](#_Toc209271009)

[**Table S5. The sequence of changes in functional groups of different PA MPs after adsorption of Cr(VI).** 14](#_Toc209271010)

[**Figure S1. The appearance characteristics of Original and differently aged PA.** 15](#_Toc209271011)

[**Figure S2. Changes in pH values before and after the reactions of Original-PA, UV-PA, UV-Sea-PA, and Cl-PA under different pH conditions.** 16](#_Toc209271012)

[**Figure S3. The synchronous and asynchronous 2D-COS correlation maps of Cr(VI) adsorption by Original-PA (a), UV-PA (b), UV-Sea-PA (c), and Cl-PA (d).** 17](#_Toc209271013)

[**Figure S4. The High-resolution XPS spectra of Cr 2p adsorption of Cr(VI) by Original-PA, UV-PA, UV-Sea-PA and Cl-PA.** 18](#_Toc209271014)

[**Figure S5. The High-resolution XPS spectra of Cr 2p for Cr(VI) adsorption by UV-PA after secondary UV aging treatment.** 19](#_Toc209271015)

[**References** 20](#_Toc209271016)

**Text S1. Characterization of PA MPs**

In this study, scanning electron microscopy (SEM, ZEISS GeminiSEM 360, Germany) was used to observe the surface morphology of the original and aged PA MPs. To investigate the aging process and the changes of PA MPs functional groups and chemical composition after adsorption of Cr(Ⅵ), Fourier Transform Infrared Spectrometer (FT-IR, Thermo Fisher Scientific Nicolet iS20, USA) was employed for characterization and analysis. Meanwhile, the elemental content of aged PA MPs before and after adsorption of Cr(Ⅵ) was determined using X-ray photoelectron spectroscopy (XPS, Thermo Scientific K-Alpha, USA), and the interaction mechanism was further analyzed.

**Text S2. Adsorption of Cr(VI) on MPs**

Adsorption experiments were conducted in 50 mL conical flasks containing 0.1 g of PA MPs and 50 mL of a 5 mg/L Cr(VI) solution. The mixture was then placed in a shaker set to 298 K and 200 rpm for 48 hours. For the XPS analysis of Cr(VI) adsorbed PA MPs, a 50 mg/L Cr(VI) solution was used, with all other experimental conditions remaining the same. After the reaction, the mixture was filtered using a 0.22 μm membrane filter, and the resulting samples were analyzed with a UV-visible spectrophotometer (MAPADA UV1800) to determine the Cr(VI) concentration.

**Text S3. Adsorption influence factors**

The effects of pH, temperature, salinity, and HA on the adsorption of Cr (VI) by PA MPs before and after aging were investigated by a single-factor experiment. The pH of the solution was adjusted to 3, 4, 5, 7, 9, and 10 using 0.1 M NaOH and HCl solutions to investigate the influence of solution pH on the adsorption process. The reaction temperatures were adjusted to 288 K, 298 K, and 308 K using a thermostatic shaking incubator to explore the influence of temperature. To thoroughly examine the impact of salinity and HA on the adsorption behavior of Cr(VI), deionized water, deionized water containing 0.1 mg/L HA, semi-saline water (deionized water mixed with seawater at a volume ratio of 1:1), and seawater were utilized as experimental media, respectively.

**Text S4. Adsorption kinetics**

By the experimental conditions, 0.1 g of PA MPs was mixed with 50 mL of Cr(VI) solution at a concentration of 5 mg/L. Adsorption experiments were conducted at contact time intervals of 0.5, 1, 4, 8, 16, 24, 48, and 72 h to obtain adsorption kinetic data. The adsorption kinetics were analyzed using both pseudo-first-order and pseudo-second-order models.

(1) The pseudo-first-order kinetic[1]:

Where: *Qt* (mg/g) is the adsorption amount of Cr(Ⅵ) by PA MPs at time *t*(h), *Qe* (mg/g) is the adsorption amount of Cr(Ⅵ) by PA-MPs at equilibrium, *t* (h) is the time, and *K1* (1/h) are the rate constants of the pseudo-first-order.

(2) The pseudo-second-order kinetic[2]:

Where: *Qt* (mg/g) is the adsorption amount of Cr(Ⅵ) by PA MPs at time *t*(h), *Qe* (mg/g) is the adsorption amount of Cr(Ⅵ) by PA-MPs at equilibrium, *t* (h) is the time, and *K2* (g/(mg·h)) are the rate constants of pseudo-second-order.

**Text S5. Adsorption isotherms**

To investigate the adsorption behavior of PA MPs on Cr(VI), a series of experiments were conducted. In these experiments, 0.1 g of PA MPs were mixed with 50 mL of Cr(VI) solution at varying initial concentrations (0.1, 0.5, 1, 5, 10, 15, and 20 mg/L). The samples were taken after reacting for 48 hours at a constant temperature to obtain the adsorption isotherm data. The experimental data were fitted and analyzed using both the Langmuir isothermal model and the Freundlich isothermal model.

(1) Langmuir isothermal model[3]:

Where: *Qe* (mg/g) is the equilibrium adsorption amount of Cr(Ⅵ) by PA MPs, *Qmax* (mg/g) is the saturation adsorption amount of Cr(Ⅵ) by PA MPS, *Ce* (mg/L) is the equilibrium concentration of Cr(Ⅵ), and *KL* (L/mg) is he adsorption coefficients of Langmuir.

(2) Freundlich isothermal model[4]:

Where: *Qe* (mg/g) is the equilibrium adsorption amount of Cr(Ⅵ) by PA MPs, *Qmax* (mg/g) is the saturation adsorption amount of Cr(Ⅵ) by PA MPS, *Ce* (mg/L) is the equilibrium concentration of Cr(Ⅵ), 1/n is the Freundlich model parameter, and *KF* (mg/g) is the adsorption coefficients of Freundlich.

**Text S6. Adsorption transformation**

This study systematically investigated the impacts of UV light, DOM, and dissolved oxygen (DO) on Cr(VI) adsorption and reductive transformation by both original and aged PA MPs. The dosage of MPs in the experiment was 2g/L and the concentration of Cr(VI) was 5mg/L. This study established four experimental groups, with the conditions for each group set as follows: (1) Blank control group: Experiments were conducted in a dark environment, without the addition of DOM, and without nitrogen deoxygenation treatment. (2) UV irradiation group: Experiments were conducted under UV-A (wavelength 275 nm) irradiation, without the addition of DOM, and without nitrogen deoxygenation treatment. (3) DOM addition group: Experiments were conducted in a dark environment, with the addition of HA at a concentration of 0.1 mg/L as DOM, and without nitrogen deoxygenation treatment. (4) Hypoxia group: Experiments were conducted in a dark environment, without the addition of DOM, and with nitrogen deoxygenation to maintain DO concentration below 0.5 mg/L. All experimental groups were reacted for 48 hours.

**Text S7. Analytical methods**

This study determined the concentration of Cr(VI) in water samples by using the method of "Water quality - Determination of chromium(Ⅵ) - 1,5-Diphenylcarbohydrazide spectrophotometric method (China, 1987)", and analyzed the total chromium concentration according to "Water quality - Determination of total chromium (China, 1987)".Cr(VI) was reacted with 1,5-diphenylcarbohydrazide and subsequently measured by UV-visible spectrophotometer at 540 nm to obtain the content of Cr(VI) in the samples. Among them, Cr(VI) recovery reached 96% and total chromium recovery reached 98%. All experiments in this study were performed in duplicate.

(1)Calculate the adsorbed amount *Qe* (mg/g) based on conservation of mass：

Where: *C*0 and *Ce* (mg/L) are the initial Cr (VI) concentration in the solution and the residual Cr (VI) concentration in the solution after the adsorption reaction, respectively, *V* (L) is the volume of Cr (VI) solution, *m* (g) is the mass of the PA MPs.

**Table S1. Fitting parameters adsorption kinetics for Cr(Ⅵ) to Original-PA, UV-PA, UV-Sea-PA, and Cl-PA.**

**Table S1.** Fitting parameters adsorption kinetics for Cr(Ⅵ) to Original-PA, UV-PA, UV-Sea-PA, and Cl-PA.

| MPs | Pseudo-first order kinetic model | | | Pseudo-second order kinetic model | | |
| --- | --- | --- | --- | --- | --- | --- |
| *Q*e, (mg/g) | *K*1 (1/h) | *R*2 | *Q*e, (mg/g) | *K*2 (g/(mg·h)) | *R*2 | |
| Original-PA | 0.2553 | 0.2467 | 0.8267 | 0.2700 | 1.6948 | 0.8921 | |
| UV-PA | 0.2623 | 0.3956 | 0.7576 | 0.2821 | 2.1645 | 0.9085 | |
| UV-Sea-PA | 0.1310 | 1.4747 | 0.8054 | 0.1586 | 2.5972 | 0.9594 | |
| Cl-PA | 0.1466 | 0.2695 | 0.9262 | 0.1350 | 18.7206 | 0.7646 | |

**Table S2. Fitting parameters of adsorption isotherms for Cr(VI) to Original-PA, UV-PA, UV-Sea-PA, and Cl-PA.**

**Table S2.** Fitting parameters of adsorption isotherms for Cr(VI) to Original-PA, UV-PA, UV-Sea-PA, and Cl-PA.

| MPs | Langmuir model | | | Freundlich model | | | |
| --- | --- | --- | --- | --- | --- | --- | --- |
| *K*L | *Q*max (mg/g) | *R*2 | *K*f | *n-1* | *R*2 |
| Original-PA | 0.0899 | 0.6800 | 0.9936 | 0.0730 | 0.6174 | 0.9838 |
| UV-PA | 0.1062 | 0.7082 | 0.9865 | 0.0957 | 0.5564 | 0.9945 |
| UV-Sea-PA | 0.1619 | 0.2436 | 0.9659 | 0.0389 | 0.5474 | 0.9097 |
| Cl -PA | 0.2809 | 0.2483 | 0.9644 | 0.0575 | 0.4622 | 0.8908 |

**Table S3. The 2D-COS data of UV-PA, UV-Sea-PA, and Cl-PA aging.**

**Table S3.** The 2D-COS data of UV-PA, UV-Sea-PA, and Cl-PA aging.

| **Peak(cm-1)** | **Assignments** | **Sign** | | | | | |
| --- | --- | --- | --- | --- | --- | --- | --- |
| **X-axis** | **Y-axis** | | | | | |
|  |  | **1252** | **1551** | **1642** | **2865** | **2930** | **3423** |
| **1252** | **C-N** | **+++** | **+++**  **(---)** | **-++**  **(--+)** | **+++**  **(-++)** | **+++**  **(-++)** | **++-**  **(-++)** |
| **1551** | **-NH-CO-** |  | **+++** | **-++**  **(-++)** | **+++**  **(+++)** | **+++**  **(+++)** | **++-**  **(+++)** |
| **1642** | **C=O** |  |  | **+++** | **-++**  **(+++)** | **-++**  **(+++)** | **-+-**  **(+++)** |
| **2865** | **C-H** |  |  |  | **+++** | **+++**  **(--)** | **++-**  **(+++)** |
| **2930** | **C-H** |  |  |  |  | **+++** | **++-**  **(+++)** |
| **3423** | **N-H** |  |  |  |  |  | **+++** |

Note: The symbol in front represents synchronous (Φ), and the symbol behind represents asynchronous (Ψ, in parentheses).

**Table S4. The 2D-COS data of Cr(Ⅵ) adsorption by Original-PA, UV-PA, UV-Sea-PA, and Cl-PA.**

**Table S4.** The 2D-COS data of Cr(Ⅵ) adsorption by Original-PA, UV-PA, UV-Sea-PA, and Cl-PA.

| **Peak(cm-1)** | **Assignments** | **Sign** | | | | | |
| --- | --- | --- | --- | --- | --- | --- | --- |
| **X-axis** | **Y-axis** | | | | | |
|  |  | **1252** | **1551** | **1642** | **2865** | **2930** | **3423** |
| **1252** | **C-N** | **++++** | **++++**  **(--++)** | **++++**  **(-+++)** | **++++**  **(++--)** | **++++**  **(++--)** | **++++**  **(+++-)** |
| **1551** | **-NH-CO-** |  | **++++** | **++++**  **(++++)** | **++++**  **(++--)** | **++++**  **(++--)** | **++++**  **(++--)** |
| **1642** | **C=O** |  |  | **++++** | **++++**  **(++--)** | **++++**  **(++--)** | **++++**  **(++--)** |
| **2865** | **C-H** |  |  |  | **++++** | **++++**  **(-+++)** | **++++**  **(--++)** |
| **2930** | **C-H** |  |  |  |  | **++++** | **++++**  **(--++)** |
| **3423** | **N-H** |  |  |  |  |  | **++++** |

Note: The symbol in front represents synchronous (Φ), and the symbol in the back represents asynchronous (Ψ, in parentheses).

**Table S5. The sequence of changes in functional groups of different PA MPs after adsorption of Cr(VI).**

**Table S5.** The sequence of changes in functional groups of different PA MPs after adsorption of Cr(VI).

| Types of PA | Functional group reaction sequence |
| --- | --- |
| Original-PA | -NH-CO-＞C=O＞C-N＞N-H＞C-H＞C-H |
| UV-PA | -NH-CO-＞C-N＞C=O＞N-H＞C-H＞C-H |
| UV-Sea-PA | C-H＞C-H＞C-N＞N-H＞-NH-CO-＞C=O |
| Cl-PA | C-H＞C-H＞N-H＞C-N＞-NH-CO-＞C=O |

**Figure S1. The appearance characteristics of Original and differently aged PA.**


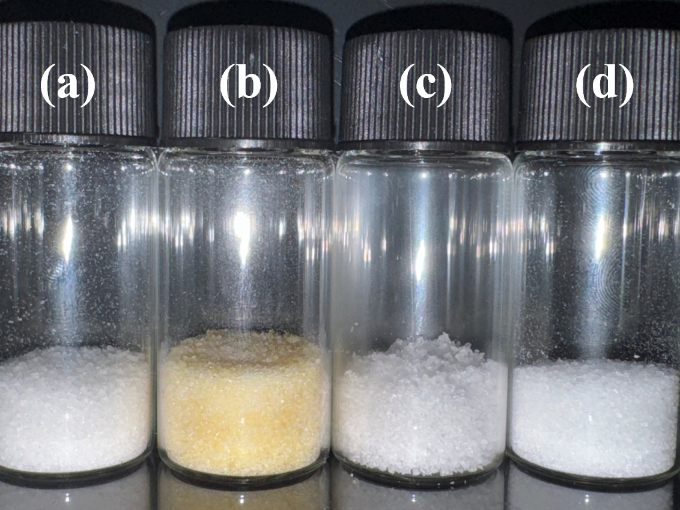


**Figure S1.** The appearance characteristics of Original and differently aged PA.

(Original-PA(a); UV-PA(b); UV-Sea-PA(c); Cl-PA (d))

**Figure S2. Changes in pH values before and after the reactions of Original-PA, UV-PA, UV-Sea-PA, and Cl-PA under different pH conditions.**


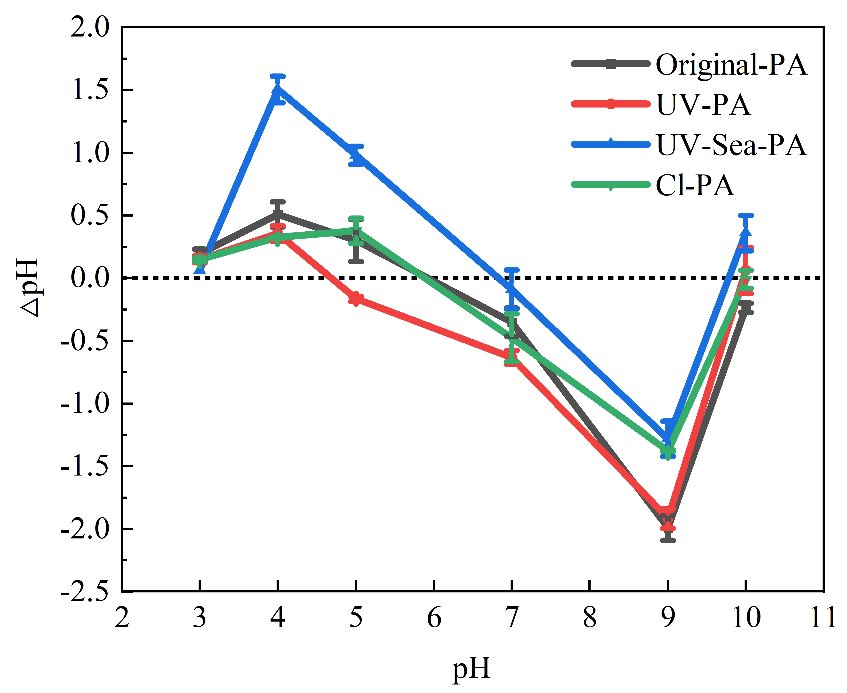


**Figure S2.** Changes in pH values before and after the reactions of Original-PA, UV-PA, UV-Sea-PA, and Cl-PA under different pH conditions.

**Figure S3. The synchronous and asynchronous 2D-COS correlation maps of Cr(VI) adsorption by Original-PA (a), UV-PA (b), UV-Sea-PA (c), and Cl-PA (d).**


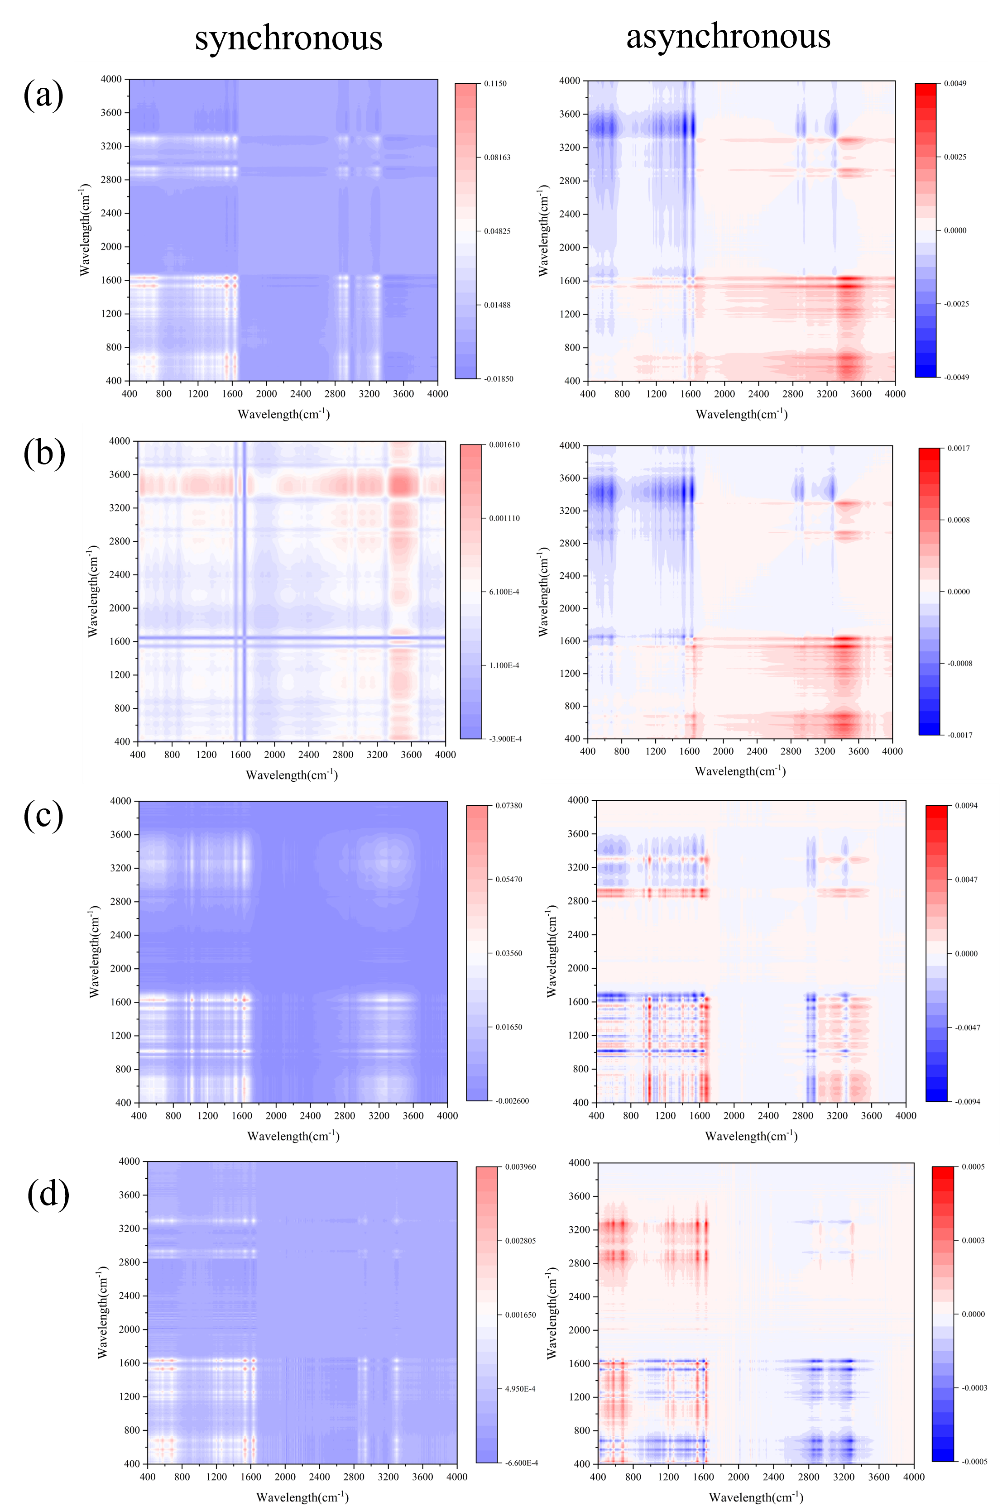


**Figure S3.** The synchronous and asynchronous 2D-COS correlation maps of Cr(VI) adsorption by Original-PA (a), UV-PA (b), UV-Sea-PA (c), and Cl-PA (d).

**Figure S4. The High-resolution XPS spectra of Cr 2p adsorption of Cr(VI) by Original-PA, UV-PA, UV-Sea-PA and Cl-PA.**


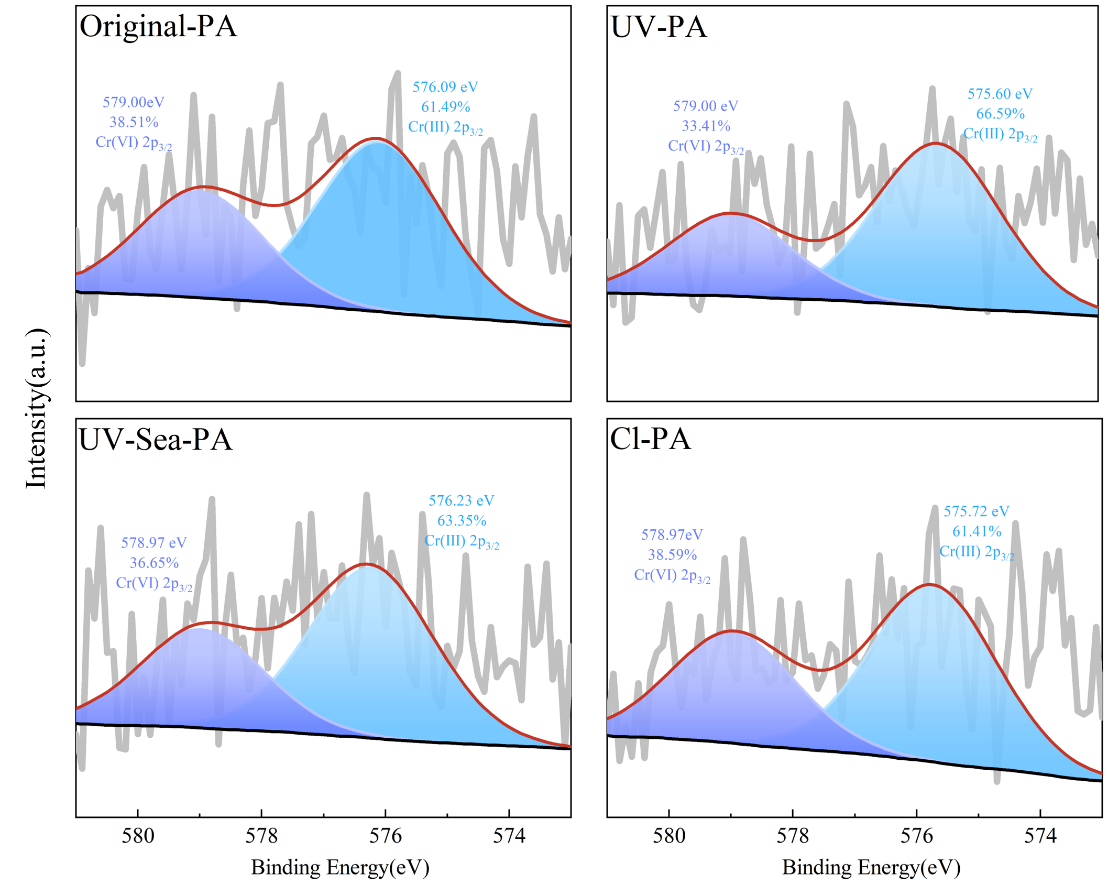


**Figure S4.** The High-resolution XPS spectra of Cr 2p adsorption of Cr(VI) by Original-PA, UV-PA, UV-Sea-PA and Cl-PA.

**Figure S5. The High-resolution XPS spectra of Cr 2p for Cr(VI) adsorption by UV-PA after secondary UV aging treatment.**


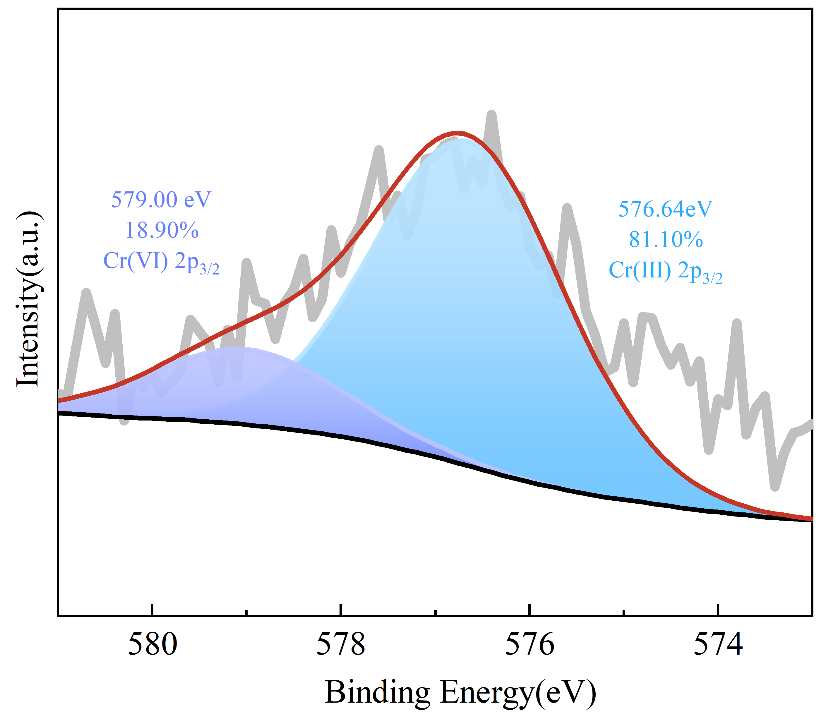


**Figure S5.** The High-resolution XPS spectra of Cr 2p for Cr(VI) adsorption by UV-PA after secondary UV aging treatment.

**References**

1. Wang X, Zhang R, Li Z, Yan B (2022) Adsorption properties and influencing factors of Cu(II) on polystyrene and polyethylene terephthalate microplastics in seawater. Sci Total Environ 812:152573–152585. https://doi.org/10.1016/j.scitotenv.2021.152573

2. Lin W-H, Kuo J, Lo S-L (2021) Effect of light irradiation on heavy metal adsorption onto microplastics. Chemosphere 285:131457. https://doi.org/10.1016/j.chemosphere.2021.131457

3. Li Y, Zhang Y, Su F, et al (2022) Adsorption behaviour of microplastics on the heavy metal Cr(VI) before and after ageing. Chemosphere 302:134865. https://doi.org/10.1016/j.chemosphere.2022.134865

4. Wang Y, Wang X, Li Y, et al (2020) Biofilm alters tetracycline and copper adsorption behaviors onto polyethylene microplastics. Chem Eng J 392:123808. https://doi.org/10.1016/j.cej.2019.123808
